# Supplementary material for: New solid phase microextraction fiber based on an eggshell membrane coating for determination of polycyclic aromatic hydrocarbons
Source: Royal Society of Chemistry journal article supplement (doi:10.1039/c6ra10815f), 2016-01-01
Supplement: c6ra10815f1.pdf [file c6ra10815f1.pdf]

S1. Photographs of the conversion of eggshell membrane to SEP by thioglycolic acid and acetic acid treatment.

S2. FT-IR spectra of eggshell membrane and SEP.

S3. Effect of extraction time on extraction efficiency. Extraction conditions were the same as in Fig. 3.

S4. Effect of stirring rate on the extraction efficiency. Extraction conditions were the same as in Fig. 3.

S5. Effect of desorption solvent (A) and desorption time (B) on the extraction efficiency of the PAHs. Extraction conditions were the same as in Fig. 3.

S6. Effect of salt concentration (A) and solution pH (B) on the extraction efficiency of the PAHs. Extraction conditions were the same as in Fig. 3.

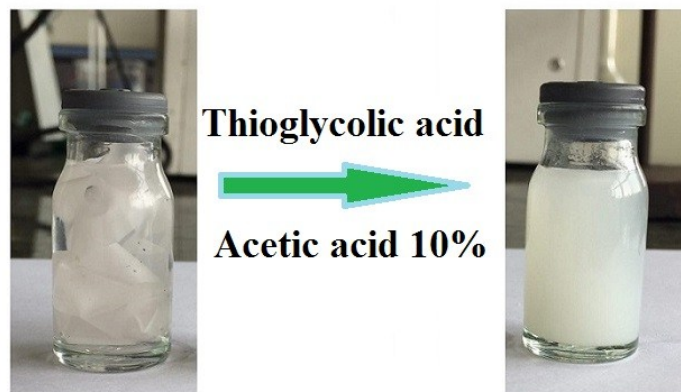

S1

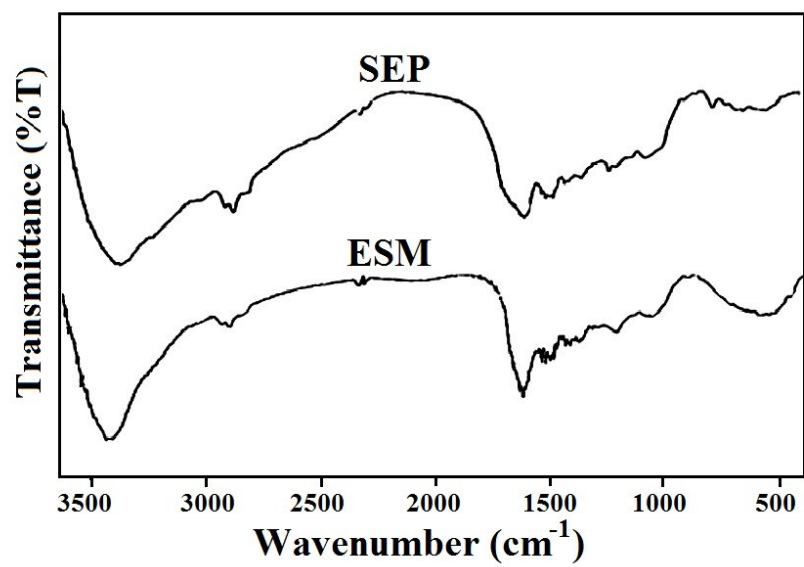

S2

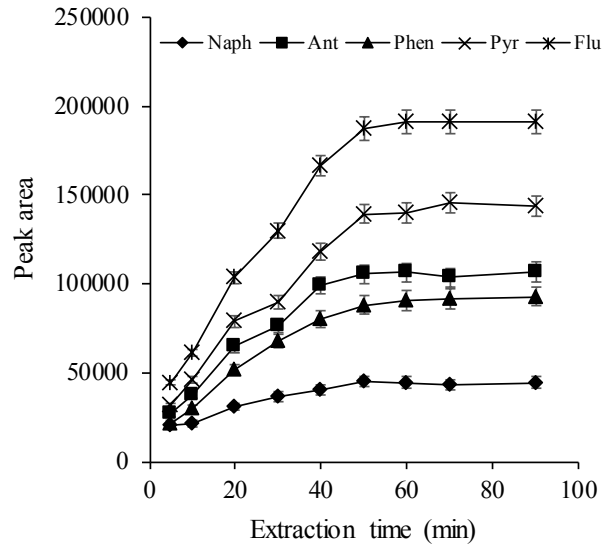

S3

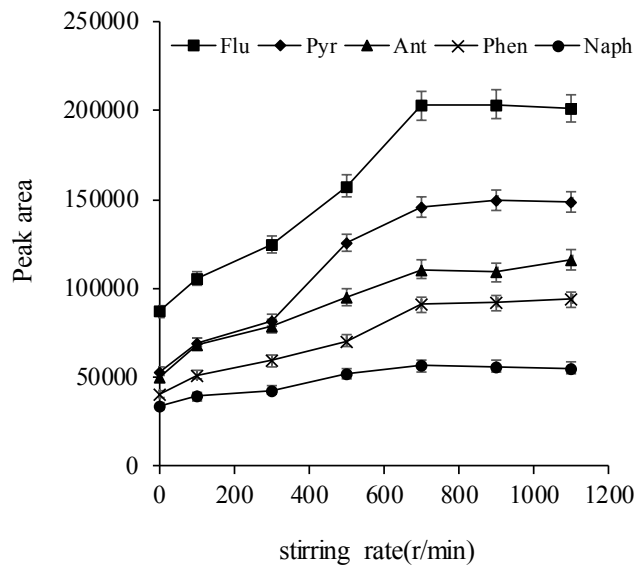

S4

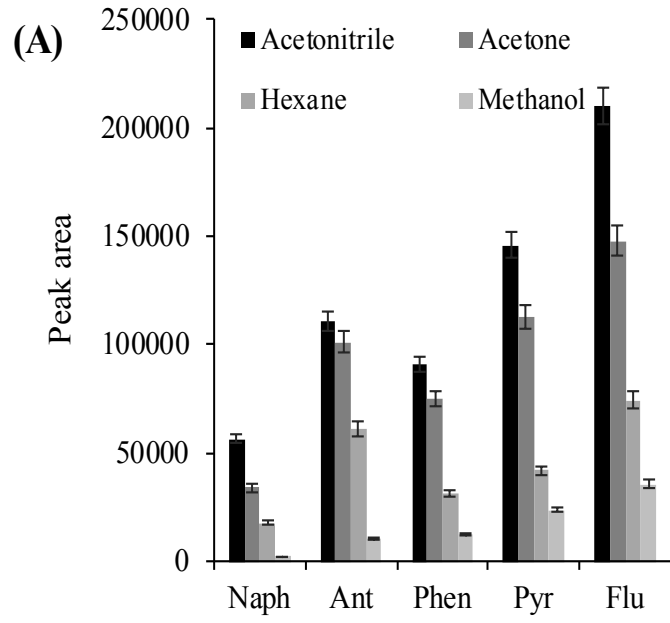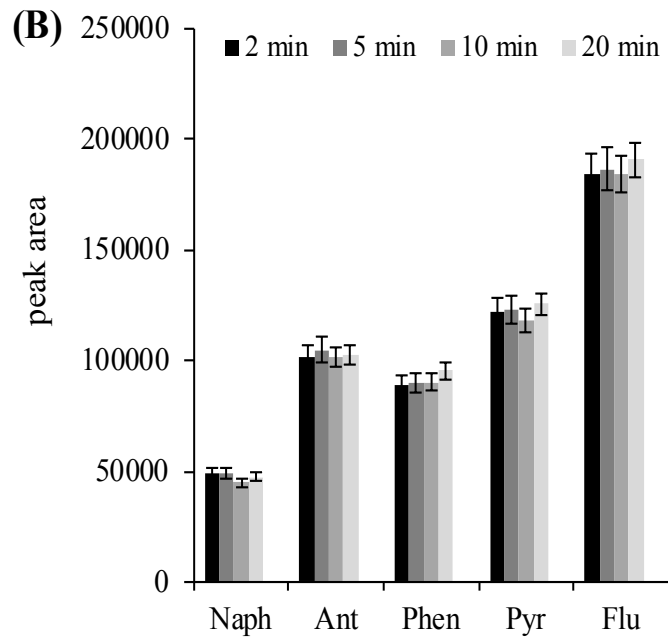

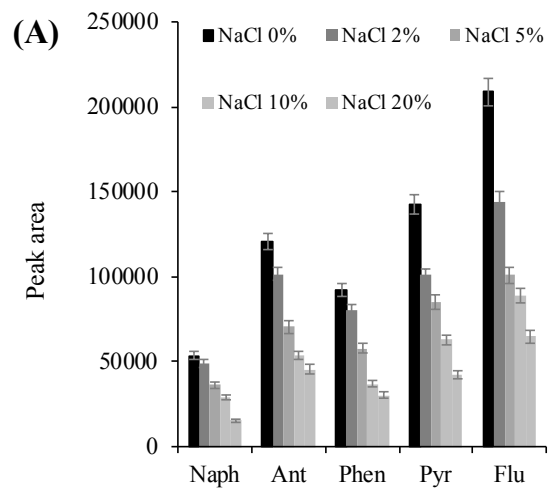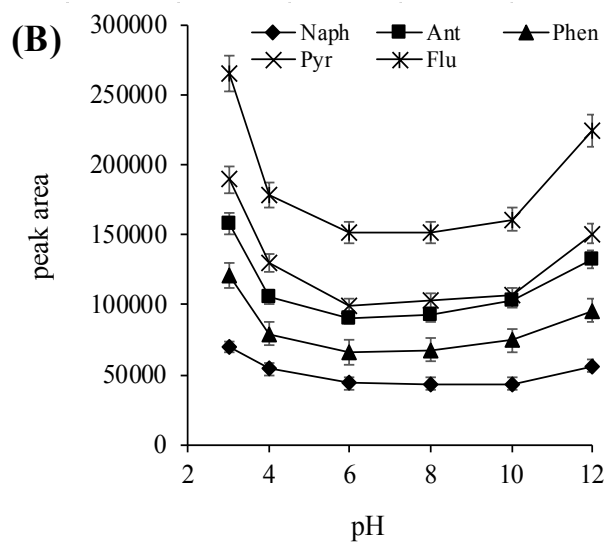

Table S1. The ratio of SEP–fiber extraction efficiency obtained after treatment ( $E_a$ ) to that of before treatment ( $E_b$ ) in various solutions ( $E_a/E_b$ )

| Solutions                    | Naph   | Phen   | Ant    | Flu    | Pyr    |
|------------------------------|--------|--------|--------|--------|--------|
| NaCl 1 mol L <sup>-1</sup>   | 0.9872 | 1.0112 | 0.9604 | 0.9699 | 1.0242 |
| HCl 0.1 mol L <sup>-1</sup>  | 0.9477 | 0.9707 | 1.0220 | 1.0264 | 1.0183 |
| NaOH 0.1 mol L <sup>-1</sup> | 1.0760 | 1.1573 | 1.0469 | 1.0334 | 1.1164 |
| Methanol                     | 1.0168 | 1.0415 | 0.9893 | 0.9990 | 1.0550 |
| Acetonitrile                 | 0.9181 | 0.9404 | 0.8932 | 0.9211 | 1.0167 |
| n–Hexane                     | 0.8905 | 0.9122 | 0.8664 | 0.9035 | 0.9240 |
| Acetone                      | 1.0859 | 1.1123 | 1.0565 | 0.9811 | 1.1267 |
